# Supplementary material
Source: publisher figshare collection journal article supplement (https://acs.figshare.com/ndownloader/files/5699646)
Supplement: Supplementary file 1 [file 5699646]

#==============================================================================

data__(NEt4)Mn2(salen)2Fe(CN)6_

#==============================================================================

# CHEMICAL DATA

_chemical_formula_sum                  'C46 H48 Fe N11 Mn2 O4 '
_chemical_formula_moiety               'C46 H48 Fe N11 Mn2 O4 '
_chemical_formula_weight               984.68
_chemical_melting_point                ?

#==============================================================================

# CRYSTAL DATA
_symmetry_cell_setting                 monoclinic
_symmetry_space_group_name_H-M        'P 1 21/c 1'
_symmetry_Int_Tables_number            14
loop_
_symmetry_equiv_pos_as_xyz
 'x,y,z'
 '-x,-y,-z'
 '-x,y+1/2,-z+1/2'
 'x,-y+1/2,z+1/2'

#------------------------------------------------------------------------------

_cell_length_a                         12.3660(8)
_cell_length_b                         15.311(1)
_cell_length_c                         12.918(1)
_cell_angle_alpha                      90
_cell_angle_beta                       110.971(4)
_cell_angle_gamma                      90
_cell_volume                           2283.8(3)
_cell_formula_units_Z                  2
_cell_measurement_reflns_used          13930
_cell_measurement_theta_min            2.2
_cell_measurement_theta_max            24.4
_cell_measurement_temperature          123.1

#------------------------------------------------------------------------------

_exptl_crystal_description            'block'
_exptl_crystal_colour                 'brown'
_exptl_crystal_size_max                0.32
_exptl_crystal_size_mid                0.30
_exptl_crystal_size_min                0.26
_exptl_crystal_density_diffrn          1.432
_exptl_crystal_density_meas            ?
_exptl_crystal_density_method         'not measured'
_exptl_crystal_F_000                   1018.00
_exptl_absorpt_coefficient_mu          0.913
_exptl_absorpt_correction_type         multi-scan
_exptl_absorpt_process_details         
;
    Higashi, T. (1995). Program for Absorption Correction.
    Rigaku Corporation, Tokyo, Japan.
;
_exptl_absorpt_correction_T_min        0.172
_exptl_absorpt_correction_T_max        0.789

#==============================================================================

# EXPERIMENTAL DATA

_diffrn_radiation_type                'Mo K\a'
_diffrn_radiation_wavelength           0.7107
_diffrn_measurement_device_type       'Rigaku RAXIS-RAPID'
_diffrn_measurement_method             \w
_diffrn_detector_area_resol_mean       10.00
_diffrn_reflns_number                  22076
_diffrn_reflns_av_R_equivalents        0.067
_diffrn_reflns_theta_max               27.36
_diffrn_measured_fraction_theta_max    0.9821
_diffrn_reflns_theta_full              27.36
_diffrn_measured_fraction_theta_full   0.9821
_diffrn_reflns_limit_h_min             -15
_diffrn_reflns_limit_h_max             15
_diffrn_reflns_limit_k_min             -19
_diffrn_reflns_limit_k_max             19
_diffrn_reflns_limit_l_min             -14
_diffrn_reflns_limit_l_max             16

#==============================================================================

# REFINEMENT DATA

_refine_special_details
;
    Refinement using reflections with F^2^ > 3.0 sigma(F^2^).
    The weighted R-factor (wR) and goodness of fit (S) are based on F^2^.
    R-factor (gt) are based on F. The threshold expression of
    F^2^ > 2.0 sigma(F^2^) is used only for calculating R-factor (gt).
;
_reflns_number_total                   5266
_reflns_number_gt                      4087
_reflns_threshold_expression           F^2^>2.0\s(F^2^)
_refine_ls_structure_factor_coef       Fsqd
_refine_ls_R_factor_gt                 0.0580
_refine_ls_wR_factor_ref               0.1700
_refine_ls_hydrogen_treatment          constr
_refine_ls_number_reflns               4087
_refine_ls_number_parameters           324
_refine_ls_goodness_of_fit_ref         1.137
_refine_ls_weighting_scheme            calc
_refine_ls_weighting_details
'w = 1/[0.005Fo^2^ + 1.000\s^2^(Fo)]/(4Fo^2^)'
_refine_ls_shift/su_max                0.0030
_refine_diff_density_max               3.34
_refine_diff_density_min               -1.23
_refine_ls_extinction_method           none
_refine_ls_extinction_coef             ?

loop_
_atom_type_symbol
_atom_type_description
_atom_type_scat_dispersion_real
_atom_type_scat_dispersion_imag
_atom_type_scat_source
  'C' 'C'  0.006 0.003 
;
International Tables for Crystallography
(1992, Vol. C, Tables 4.2.6.8 and 6.1.1.4)
;
  'H' 'H'  0.000 0.000 
;
International Tables for Crystallography
(1992, Vol. C, Table 6.1.1.4)
;
  'O' 'O'  0.017 0.010 
;
International Tables for Crystallography
(1992, Vol. C, Tables 4.2.6.8 and 6.1.1.4)
;
  'N' 'N'  0.011 0.006 
;
International Tables for Crystallography
(1992, Vol. C, Tables 4.2.6.8 and 6.1.1.4)
;
  'Mn' 'Mn'  0.346 0.844 
;
International Tables for Crystallography
(1992, Vol. C, Tables 4.2.6.8 and 6.1.1.4)
;
  'Fe' 'Fe'  0.349 0.972 
;
International Tables for Crystallography
(1992, Vol. C, Tables 4.2.6.8 and 6.1.1.4)
;

#==============================================================================

# ATOMIC COORDINATES AND THERMAL PARAMETERS

loop_
_atom_site_label
_atom_site_type_symbol
_atom_site_fract_x
_atom_site_fract_y
_atom_site_fract_z
_atom_site_U_iso_or_equiv
_atom_site_adp_type
_atom_site_occupancy
_atom_site_symmetry_multiplicity
_atom_site_calc_flag
_atom_site_refinement_flags
_atom_site_disorder_assembly
_atom_site_disorder_group
 Fe1    Fe 0.0000      0.5000      0.5000      0.0162(2)   Uani 1.00 1 d . . .
 Mn1    Mn 0.09299(4)  0.19701(3)  0.71538(3)  0.0170(1)   Uani 1.00 1 d . . .
 O1     O  0.0036(2)   0.1359(1)   0.5861(2)   0.0212(5)   Uani 1.00 1 d . . .
 O2     O  0.2373(2)   0.1714(1)   0.7010(2)   0.0214(5)   Uani 1.00 1 d . . .
 N1     N  -0.0496(2)  0.2301(2)   0.7448(2)   0.0200(6)   Uani 1.00 1 d . . .
 N2     N  0.1697(2)   0.2664(2)   0.8532(2)   0.0196(6)   Uani 1.00 1 d . . .
 N3     N  0.0794(2)   0.3279(2)   0.6298(2)   0.0237(7)   Uani 1.00 1 d . . .
 N4     N  0.0974(2)   0.4235(2)   0.3279(2)   0.0223(7)   Uani 1.00 1 d . . .
 N5     N  0.2318(3)   0.5955(2)   0.6250(3)   0.0365(9)   Uani 1.00 1 d . . .
 N6     N  0.5000      0.0000      1.0000      0.024(1)    Uani 1.00 1 d . . .
 C1     C  -0.1012(3)  0.1021(2)   0.5629(2)   0.0195(7)   Uani 1.00 1 d . . .
 C2     C  -0.1428(3)  0.0434(2)   0.4730(3)   0.0220(8)   Uani 1.00 1 d . . .
 C3     C  -0.2493(3)  0.0044(2)   0.4455(3)   0.0267(8)   Uani 1.00 1 d . . .
 C4     C  -0.3204(3)  0.0222(2)   0.5076(3)   0.0285(9)   Uani 1.00 1 d . . .
 C5     C  -0.2833(3)  0.0814(2)   0.5938(3)   0.0248(8)   Uani 1.00 1 d . . .
 C6     C  -0.1756(3)  0.1237(2)   0.6215(3)   0.0208(7)   Uani 1.00 1 d . . .
 C7     C  -0.1464(3)  0.1903(2)   0.7071(3)   0.0216(8)   Uani 1.00 1 d . . .
 C8     C  -0.0300(3)  0.3018(2)   0.8266(3)   0.0252(8)   Uani 1.00 1 d . . .
 C9     C  0.0914(3)   0.2897(2)   0.9123(3)   0.0233(8)   Uani 1.00 1 d . . .
 C10    C  0.2743(3)   0.2952(2)   0.8862(3)   0.0221(8)   Uani 1.00 1 d . . .
 C11    C  0.3596(3)   0.2720(2)   0.8378(3)   0.0222(8)   Uani 1.00 1 d . . .
 C12    C  0.4714(3)   0.3088(2)   0.8870(3)   0.0287(9)   Uani 1.00 1 d . . .
 C13    C  0.5612(3)   0.2874(2)   0.8529(3)   0.0323(9)   Uani 1.00 1 d . . .
 C14    C  0.5390(3)   0.2255(2)   0.7658(3)   0.0284(9)   Uani 1.00 1 d . . .
 C15    C  0.4314(3)   0.1897(2)   0.7164(3)   0.0224(8)   Uani 1.00 1 d . . .
 C16    C  0.3380(3)   0.2111(2)   0.7499(3)   0.0200(7)   Uani 1.00 1 d . . .
 C17    C  0.0521(3)   0.3936(2)   0.5842(2)   0.0204(7)   Uani 1.00 1 d . . .
 C18    C  0.0617(3)   0.4547(2)   0.3918(3)   0.0191(7)   Uani 1.00 1 d . . .
 C19    C  0.1456(3)   0.5585(2)   0.5790(3)   0.0233(8)   Uani 1.00 1 d . . .
 C20    C  0.4550(7)   0.0113(5)   1.0964(6)   0.033(2)    Uani 0.50 1 d P . .
 C21    C  0.4228(6)   0.0770(4)   0.9758(6)   0.028(2)    Uani 0.50 1 d P . .
 C22    C  0.4003(6)   -0.0055(5)  0.8884(6)   0.030(2)    Uani 0.50 1 d P . .
 C23    C  0.3287(4)   -0.0989(4)  0.8916(5)   0.061(2)    Uani 1.00 1 d . . .
 C24    C  0.4348(6)   -0.0863(4)  1.0111(6)   0.028(2)    Uani 0.50 1 d P . .
 C25    C  0.3727(4)   0.0946(3)   1.0759(4)   0.046(1)    Uani 1.00 1 d . . .
 H1     H  -0.0955(3)  0.0299(2)   0.4312(3)   0.026(1)    Uiso 1.00 1 c . . .
 H2     H  -0.2759(3)  -0.0343(2)  0.3840(3)   0.031(1)    Uiso 1.00 1 c . . .
 H3     H  -0.3925(3)  -0.0069(2)  0.4910(3)   0.034(1)    Uiso 1.00 1 c . . .
 H4     H  -0.3314(3)  0.0938(2)   0.6352(3)   0.030(1)    Uiso 1.00 1 c . . .
 H5     H  -0.2040(3)  0.2057(2)   0.7366(3)   0.027(1)    Uiso 1.00 1 c . . .
 H6     H  -0.0853(3)  0.2985(2)   0.8620(3)   0.033(1)    Uiso 1.00 1 c . . .
 H7     H  -0.0360(3)  0.3570(2)   0.7912(3)   0.033(1)    Uiso 1.00 1 c . . .
 H8     H  0.0912(3)   0.2445(2)   0.9626(3)   0.030(1)    Uiso 1.00 1 c . . .
 H9     H  0.1165(3)   0.3427(2)   0.9519(3)   0.030(1)    Uiso 1.00 1 c . . .
 H10    H  0.2973(3)   0.3349(2)   0.9467(3)   0.027(1)    Uiso 1.00 1 c . . .
 H11    H  0.4846(3)   0.3500(2)   0.9453(3)   0.034(1)    Uiso 1.00 1 c . . .
 H12    H  0.6355(3)   0.3131(2)   0.8864(3)   0.038(1)    Uiso 1.00 1 c . . .
 H13    H  0.5997(3)   0.2089(2)   0.7409(3)   0.036(1)    Uiso 1.00 1 c . . .
 H14    H  0.4194(3)   0.1484(2)   0.6585(3)   0.028(1)    Uiso 1.00 1 c . . .


loop_
_atom_site_aniso_label
_atom_site_aniso_U_11
_atom_site_aniso_U_22
_atom_site_aniso_U_33
_atom_site_aniso_U_12
_atom_site_aniso_U_13
_atom_site_aniso_U_23
 Fe1    0.0216(4)   0.0104(3)   0.0183(3)   0.0001(2)   0.0094(2)   -0.0004(2) 
 Mn1    0.0211(3)   0.0133(3)   0.0188(3)   -0.0001(2)  0.0097(2)   -0.0007(2) 
 O1     0.025(1)    0.019(1)    0.022(1)    -0.0023(8)  0.0108(9)   -0.0021(8) 
 O2     0.024(1)    0.016(1)    0.024(1)    -0.0019(8)  0.0096(9)   -0.0041(9) 
 N1     0.027(1)    0.015(1)    0.020(1)    0.002(1)    0.011(1)    -0.000(1)  
 N2     0.025(1)    0.015(1)    0.022(1)    0.000(1)    0.011(1)    -0.000(1)  
 N3     0.032(2)    0.017(1)    0.025(1)    0.002(1)    0.014(1)    0.003(1)   
 N4     0.027(1)    0.017(1)    0.026(1)    -0.001(1)   0.013(1)    -0.001(1)  
 N5     0.031(2)    0.041(2)    0.042(2)    -0.008(1)   0.019(1)    -0.018(1)  
 N6     0.023(2)    0.022(2)    0.028(2)    0.000(1)    0.011(2)    0.003(2)   
 C1     0.021(2)    0.016(1)    0.024(1)    0.001(1)    0.011(1)    0.004(1)   
 C2     0.026(2)    0.018(1)    0.023(1)    0.003(1)    0.009(1)    0.003(1)   
 C3     0.028(2)    0.016(1)    0.032(2)    0.000(1)    0.006(1)    -0.002(1)  
 C4     0.022(2)    0.022(2)    0.041(2)    -0.000(1)   0.010(1)    0.001(1)   
 C5     0.024(2)    0.022(2)    0.029(2)    0.001(1)    0.010(1)    0.000(1)   
 C6     0.020(2)    0.018(1)    0.021(1)    0.002(1)    0.005(1)    0.001(1)   
 C7     0.028(2)    0.016(1)    0.025(1)    0.004(1)    0.014(1)    0.004(1)   
 C8     0.034(2)    0.017(1)    0.030(2)    0.003(1)    0.018(1)    -0.004(1)  
 C9     0.032(2)    0.022(2)    0.021(1)    -0.005(1)   0.015(1)    -0.004(1)  
 C10    0.028(2)    0.016(1)    0.023(1)    -0.000(1)   0.010(1)    -0.003(1)  
 C11    0.022(2)    0.018(1)    0.026(1)    -0.000(1)   0.009(1)    0.001(1)   
 C12    0.024(2)    0.024(2)    0.037(2)    -0.004(1)   0.010(1)    -0.009(1)  
 C13    0.024(2)    0.028(2)    0.044(2)    -0.005(1)   0.011(1)    -0.007(2)  
 C14    0.024(2)    0.024(2)    0.040(2)    0.000(1)    0.016(1)    -0.002(1)  
 C15    0.024(2)    0.019(1)    0.027(2)    0.001(1)    0.013(1)    -0.001(1)  
 C16    0.023(2)    0.014(1)    0.023(1)    0.001(1)    0.009(1)    0.002(1)   
 C17    0.025(2)    0.019(1)    0.021(1)    -0.002(1)   0.014(1)    -0.003(1)  
 C18    0.022(2)    0.013(1)    0.023(1)    -0.001(1)   0.008(1)    -0.000(1)  
 C19    0.027(2)    0.021(2)    0.026(2)    0.000(1)    0.015(1)    -0.003(1)  
 C20    0.044(4)    0.030(4)    0.029(3)    0.008(3)    0.019(3)    0.001(3)   
 C21    0.029(4)    0.018(3)    0.037(4)    0.006(3)    0.009(3)    0.003(3)   
 C22    0.030(4)    0.029(4)    0.024(3)    -0.003(3)   0.003(3)    0.001(3)   
 C23    0.036(2)    0.061(3)    0.084(3)    -0.023(2)   0.019(2)    -0.044(3)  
 C24    0.030(4)    0.015(3)    0.039(4)    -0.000(2)   0.014(3)    0.004(3)   
 C25    0.040(2)    0.032(2)    0.070(3)    0.000(2)    0.024(2)    -0.020(2)  

#==============================================================================

_computing_data_collection            'PROCESS-AUTO'
_computing_cell_refinement            'PROCESS-AUTO'
_computing_data_reduction             'CrystalStructure'
_computing_structure_solution         'SIR92'
_computing_structure_refinement       'CRYSTALS'
_computing_publication_material       'CrystalStructure Ver. 2.00'
_computing_molecular_graphics          ?

#==============================================================================

# MOLECULAR GEOMETRY

_geom_special_details
;
    ENTER SPECIAL DETAILS OF THE MOLECULAR GEOMETRY
;

loop_
 _geom_bond_atom_site_label_1
 _geom_bond_site_symmetry_1
 _geom_bond_atom_site_label_2
 _geom_bond_site_symmetry_2
 _geom_bond_distance
 _geom_bond_publ_flag
Fe1 . C17 . 1.936(3)    yes
Fe1 . C18 . 1.945(3)    yes
Fe1 . C19 . 1.941(3)    yes
Mn1 . O1 . 1.888(2)    yes
Mn1 . O2 . 1.900(2)    yes
Mn1 . N1 . 1.997(3)    yes
Mn1 . N2 . 1.997(3)    yes
Mn1 . N3 . 2.266(3)    yes
Mn1 . N4 . 2.337(3)    yes 
O1 . C1 . 1.326(4)    yes
O2 . C16 . 1.325(4)    yes
N1 . C7 . 1.274(4)    yes
N1 . C8 . 1.483(4)    yes
N2 . C9 . 1.476(4)    yes
N2 . C10 . 1.286(4)    yes
N3 . C17 . 1.154(4)    yes
N4 . C18 . 1.168(4)    yes
N5 . C19 . 1.165(5)    yes
N6 . C20 . 1.545(7)    yes
N6 . C21 . 1.478(6)    yes
N6 . C22 . 1.527(7)    yes
N6 . C24 . 1.581(6)    yes
C1 . C2 . 1.412(4)    yes
C1 . C6 . 1.424(4)    yes
C2 . C3 . 1.371(5)    yes
C2 . H1 . 0.95003(5)    no
C3 . C4 . 1.413(5)    yes
C3 . H2 . 0.95006(6)    no
C4 . C5 . 1.380(5)    yes
C4 . H3 . 0.94997(5)    no
C5 . C6 . 1.408(4)    yes
C5 . H4 . 0.95008(5)    no
C6 . C7 . 1.452(4)    yes
C7 . H5 . 0.950    no
C8 . C9 . 1.524(5)    yes
C8 . H6 . 0.95000(5)    no
C8 . H7 . 0.94997(7)    no
C9 . H8 . 0.94995(6)    no
C9 . H9 . 0.95000(7)    no
C10 . C11 . 1.450(4)    yes
C10 . H10 . 0.94997(6)    no
C11 . C12 . 1.416(4)    yes
C11 . C16 . 1.419(4)    yes
C12 . C13 . 1.372(5)    yes
C12 . H11 . 0.95006(6)    no
C13 . C14 . 1.420(5)    yes
C13 . H12 . 0.94999(5)    no
C14 . C15 . 1.368(5)    yes
C14 . H13 . 0.950    no
C15 . C16 . 1.410(4)    yes
C15 . H14 . 0.94997(6)    no
C20 . C25 . 1.593(8)    yes
C21 . C22 . 1.65(1)    yes
C21 . C25 . 1.643(8)    yes
C22 . C23 . 1.689(9)    yes
C23 . C24 . 1.640(9)    yes
loop_
 _geom_angle_atom_site_label_1
 _geom_angle_site_symmetry_1
 _geom_angle_atom_site_label_2
 _geom_angle_site_symmetry_2
 _geom_angle_atom_site_label_3
 _geom_angle_site_symmetry_3
 _geom_angle
 _geom_angle_publ_flag
C17 . Fe1 . C18 . 88.08(12)    yes
C17 . Fe1 . C19 . 91.91(13)    yes
C18 . Fe1 . C19 . 90.79(13)    yes
O1 . Mn1 . O2 . 94.86(9)    yes
O1 . Mn1 . N1 . 90.9(1)    yes
O2 . Mn1 . N1 . 174.20(9)    yes
O1 . Mn1 . N2 . 173.2(1)    yes
O2 . Mn1 . N2 . 91.9(1)    yes
N1 . Mn1 . N2 . 82.3(1)    yes
O1 . Mn1 . N3 . 95.1(1)    yes
O2 . Mn1 . N3 . 92.5(1)    yes
N1 . Mn1 . N3 . 87.3(1)    yes
N2 . Mn1 . N3 . 83.9(1)    yes
Mn1 . O1 . C1 . 127.53(19)    yes
Mn1 . O2 . C16 . 127.9(2)    yes
Mn1 . N1 . C7 . 125.4(2)    yes
Mn1 . N1 . C8 . 113.1(2)    yes
C7 . N1 . C8 . 121.2(3)    yes
Mn1 . N2 . C9 . 113.53(19)    yes
Mn1 . N2 . C10 . 125.4(2)    yes
C9 . N2 . C10 . 120.9(3)    yes
Mn1 . N3 . C17 . 167.8(3)    yes
O1 . Mn1 . N4 . 91.97(9)    yes
O2 . Mn1 . N4 . 94.80(9)    yes
N1 . Mn1 . N4 . 84.7(1)    yes
N2 . Mn1 . N4 . 88.1(1)    yes
Mn1 . N4 . C18 . 146.2(2)    yes
C20 . N6 . C21 . 71.9(4)    yes
C20 . N6 . C22 . 111.4(4)    yes
C21 . N6 . C22 . 66.6(4)    yes
C20 . N6 . C24 . 71.2(4)    yes
C21 . N6 . C24 . 112.0(4)    yes
C22 . N6 . C24 . 76.9(4)    yes
O1 . C1 . C2 . 118.2(3)    yes
O1 . C1 . C6 . 123.6(3)    yes
C2 . C1 . C6 . 118.1(3)    yes
C1 . C2 . C3 . 121.6(3)    yes
C1 . C2 . H1 . 119.25(18)    no
C3 . C2 . H1 . 119.2(2)    no
C2 . C3 . C4 . 120.2(3)    yes
C2 . C3 . H2 . 120.1(2)    no
C4 . C3 . H2 . 119.61(19)    no
C3 . C4 . C5 . 119.4(3)    yes
C3 . C4 . H3 . 120.42(19)    no
C5 . C4 . H3 . 120.21(19)    no
C4 . C5 . C6 . 121.2(3)    yes
C4 . C5 . H4 . 119.49(19)    no
C6 . C5 . H4 . 119.35(19)    no
C1 . C6 . C5 . 119.4(3)    yes
C1 . C6 . C7 . 122.5(3)    yes
C5 . C6 . C7 . 118.1(3)    yes
N1 . C7 . C6 . 124.7(3)    yes
N1 . C7 . H5 . 117.75(18)    no
C6 . C7 . H5 . 117.54(17)    no
N1 . C8 . C9 . 107.1(2)    yes
N1 . C8 . H6 . 109.96(16)    no
C9 . C8 . H6 . 109.56(16)    no
N1 . C8 . H7 . 110.53(16)    no
C9 . C8 . H7 . 110.17(17)    no
H6 . C8 . H7 . 109.459(4)    no
N2 . C9 . C8 . 108.2(2)    yes
N2 . C9 . H8 . 109.91(16)    no
C8 . C9 . H8 . 110.06(17)    no
N2 . C9 . H9 . 109.65(16)    no
C8 . C9 . H9 . 109.54(17)    no
H8 . C9 . H9 . 109.460(8)    no
N2 . C10 . C11 . 125.0(3)    yes
N2 . C10 . H10 . 117.45(18)    no
C11 . C10 . H10 . 117.56(18)    no
C10 . C11 . C12 . 117.0(3)    yes
C10 . C11 . C16 . 123.2(3)    yes
C12 . C11 . C16 . 119.7(3)    yes
C11 . C12 . C13 . 122.2(3)    yes
C11 . C12 . H11 . 118.81(19)    no
C13 . C12 . H11 . 119.0(2)    no
C12 . C13 . C14 . 117.7(3)    yes
C12 . C13 . H12 . 121.1(2)    no
C14 . C13 . H12 . 121.24(19)    no
C13 . C14 . C15 . 121.1(3)    yes
C13 . C14 . H13 . 119.59(19)    no
C15 . C14 . H13 . 119.3(2)    no
C14 . C15 . C16 . 122.1(3)    yes
C14 . C15 . H14 . 119.1(2)    no
C16 . C15 . H14 . 118.82(18)    no
O2 . C16 . C11 . 124.0(3)    yes
O2 . C16 . C15 . 118.7(3)    yes
C11 . C16 . C15 . 117.2(3)    yes
Fe1 . C17 . N3 . 176.5(3)    yes
Fe1 . C18 . N4 . 176.8(3)    yes
Fe1 . C19 . N5 . 178.3(3)    yes
N6 . C20 . C25 . 110.4(5)    yes
N6 . C21 . C22 . 58.1(3)    yes
N6 . C21 . C25 . 111.2(4)    yes
C22 . C21 . C25 . 130.1(5)    yes
N6 . C22 . C21 . 55.3(3)    yes
N6 . C22 . C23 . 106.1(4)    yes
C21 . C22 . C23 . 126.4(6)    yes
C22 . C23 . C24 . 71.0(4)    yes
N6 . C24 . C23 . 105.9(4)    yes
C20 . C25 . C21 . 66.5(4)    yes


#==============================================================================

# Additional structures and associated data_? identifiers
# should be added at this point if there is more than one 
# structure analysis in the CIF.

#==============================================================================

#     End of CIF

#==============================================================================
